# Supplementary material
Source: MDPI journal article supplement (https://www.mdpi.com/1424-8247/16/5/741)
Supplement: s1 [file s1]

**Table S1.** Antimicrobial susceptibility profiles of *Staphylococcus aureus*, methicillin-resistant *S. aureus*, methicillin-resistant *Staphylococcus pseudintermedius*, and *S. pseudintermedius* determined using the disk-diffusion method.

| Bacterial isolate          |     | Antimicrobial resistance profile                           |
|----------------------------|-----|------------------------------------------------------------|
| SA                         |     | NOR                                                        |
| MRSA                       |     | OX-OB-AMP-AMC-CL-FOX-CRO-CTX-FEP-NOR-EDA                   |
| MRSP                       | M01 | AMP-STX                                                    |
|                            | S01 | AMP-CTX-SXT-DO-AK-CN-E                                     |
|                            | S02 | OX-AMP-AMC-FEP-SXT-AK                                      |
|                            | S03 | OX-OB-AMP-AMC-CL-FOX-CRO-CTX-FEP-NOR-ENR-STX-DO-AK-CN-E-DA |
|                            | S04 | OX-OB-AMP-AMC-FOX-CRO-CTX-FEP-NOR-ENR-STX-DO-E-DA          |
|                            | S05 | OX-OB-AMP-AMC-CTX-FEP-NOR-ENR-STX-DO-CN-E-DA               |
|                            | S06 | OX-OB-AMP-AMC-CL-CRO-CTX-FEP-NOR-ENR-STX-DO-AK-CN          |
|                            | S07 | OX-AMP-CRO-CTX-FEP-NOR-ENR-DO-CN-E                         |
|                            | S08 | OX-OB-AMP-AMC-CL-FOX-CRO-CTX-FEP-NOR-ENR-STX-DO-CN-DA      |
|                            | S09 | OX-AMP-CRO-CTX-FEP-NOR-ENR-E-DA                            |
| <i>S. pseudintermedius</i> | M01 | NOR                                                        |
|                            | M02 | OB-AMP                                                     |
|                            | M03 | AMP-AMC                                                    |
|                            | M04 | AMP-STX-DO-CN                                              |
|                            | M05 | AMP                                                        |
|                            | M06 | AMP                                                        |
|                            | S01 | AMP                                                        |
|                            | S02 | AMP-AMC-NOR                                                |
|                            | S03 | OB-AMP-DA                                                  |
|                            | S04 | OB-AMP-DA                                                  |
|                            | S05 | OB-AMP-AK                                                  |
|                            | S06 | OB-AMP-AMC-AK                                              |
|                            | S07 | AMP-DO                                                     |
|                            | S08 | AMP-DO                                                     |
|                            | S09 | AMP                                                        |
|                            | S10 | AMP                                                        |
|                            | S11 | AMP                                                        |
|                            | S12 | AMP                                                        |
|                            | S13 | AMP                                                        |
|                            | S14 | AMP-DO                                                     |
|                            | S15 | AMP                                                        |
|                            | S16 | OB-AMP-AMC                                                 |

Abbreviations: SA, *Staphylococcus aureus* ATCC 25923; MRSA, methicillin-resistant *S. aureus* ATCC 33591; W, weak biofilm producer; M, moderate biofilm producer; S, strong biofilm producer; OX, oxacillin (1 µg); OB, cloxacillin; AMP, ampicillin (10 µg); AMC, amoxicillin–clavulanic acid (30 µg); CL, cephalixin (30 µg); FOX, cefoxitin (30 µg); CRO, ceftriaxone (30 µg); CTX, cefotaxime (30 µg); NOR, norfloxacin (10 µg); ENR, enrofloxacin (5 µg); SXT, sulfamethoxazole/trimethoprim (25 µg); DO, doxycycline (30 µg); AK, amikacin (30 µg); CN, gentamicin (10 µg); E, erythromycin (15 µg); DA, clindamycin (2 µg)
