# Supplementary material
Source: MDPI journal article supplement (https://www.mdpi.com/1424-8247/16/5/741)
Supplement: s1 [file s1]

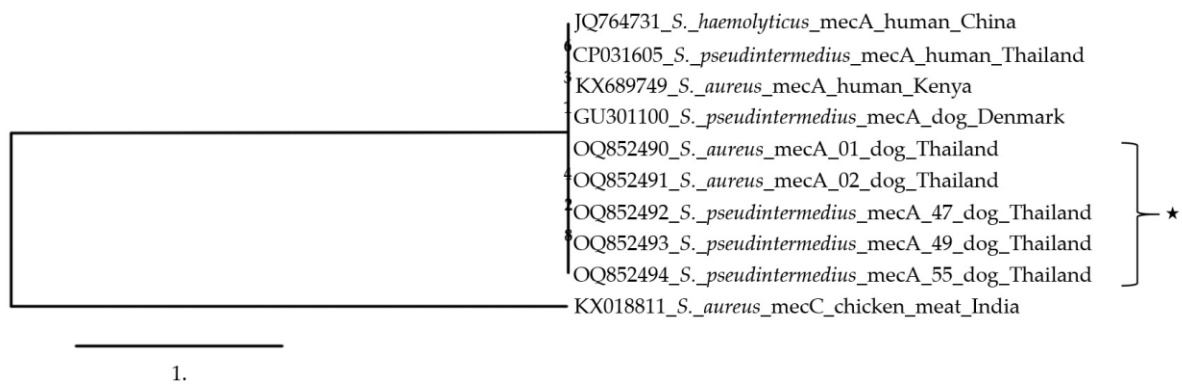

**Figure S4:** Phylogenetic tree analysis of *Staphylococcus* spp. carrying *mecA* gene based on nucleotide sequences from a 254 base pair fragment of *mecA* using the neighbor-joining method. Sequences from this study are marked with stars (accession numbers OQ852490-852494).
