# Supplementary material
Source: MDPI journal article supplement (https://www.mdpi.com/1424-8247/16/5/741)
Supplement: s1 [file s1]

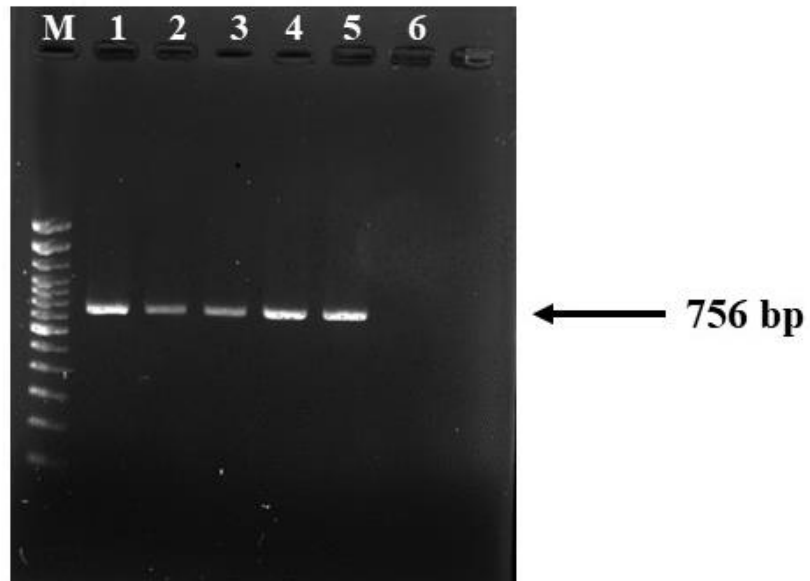

**Figure S2.** PCR amplification of the 16S rRNA gene of *Staphylococcus* spp. on 2% Agarose gel electrophoresis. Lane M DNA ladder, MW 100 bp ladder. Lane 1 *Staphylococcus aureus* sample, Lanes 2-5 *Staphylococcus pseudintermedius* samples, showed a typical band size of 756 bp corresponding to 16S rRNA of the selected isolates using 16S rRNA primers, and Lane 6 was the negative control (nuclease-free water).
