# Supplementary material
Source: MDPI journal article supplement (https://www.mdpi.com/1424-8247/16/5/741)
Supplement: s1 [file s1]

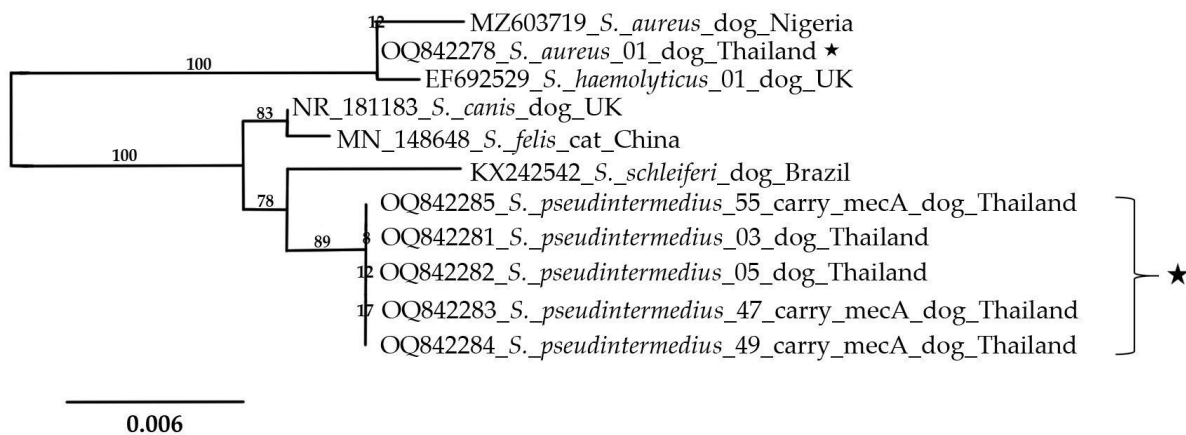

**Figure S3:** Phylogenetic tree analysis of *Staphylococcus pseudintermedius* based on nucleotide sequences from a 701 base pair fragment of 16S rRNA using the neighbor-joining method. Sequences from this study are marked with stars (accession numbers OQ842281-OQ842285).
