# Supplementary material
Source: MDPI journal article supplement (https://www.mdpi.com/1424-8247/16/5/741)
Supplement: s1 [file s1]

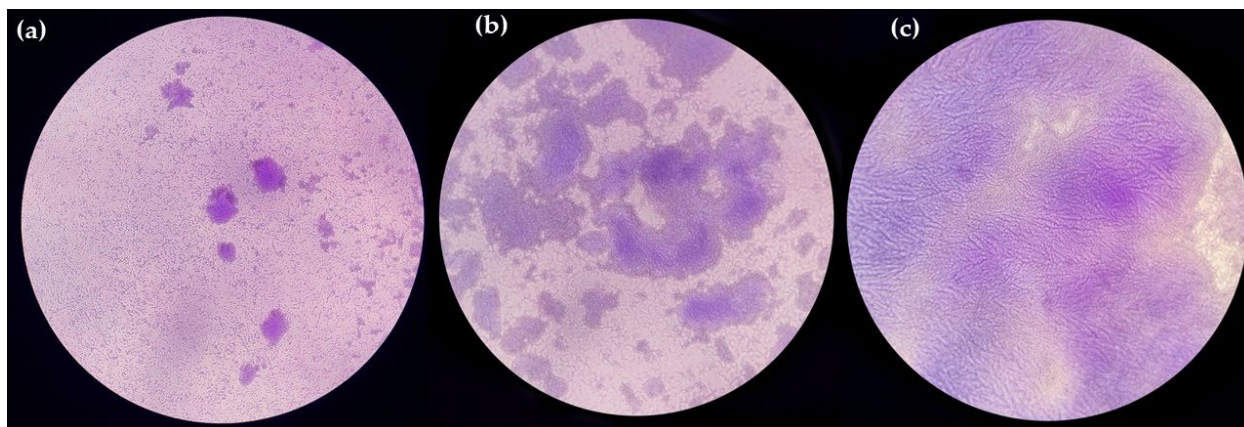

**Figure S5.** Microscopic appearance of *Staphylococcus pseudintermedius* classified as weak (a), moderate (b), and strong (c) biofilm producers after a 24h incubation (20× magnification).
