# Supplementary material
Source: MDPI journal article supplement (https://www.mdpi.com/1424-8247/16/5/741)
Supplement: s1 [file s1]

**Table S2.** Effects of *Piper nigrum* (PN) and *P. sarmentosum* (PS) ethanolic extracts on the biofilm formation of *Staphylococcus aureus* (SA), methicillin-resistant *S. aureus* (MRSA), and *Staphylococcus pseudintermedius* after 24 h of treatment.

| Bacterial isolates         |     | Percentage of biofilm inhibition |              |              |              |
|----------------------------|-----|----------------------------------|--------------|--------------|--------------|
|                            |     | PN                               |              | PS           |              |
|                            |     | 8 x MIC                          | 4 x MIC      | 8 x MIC      | 4 x MIC      |
| SA                         |     | 49.89 ± 0.47                     | 36.4 ± 0.57  | N.I.         | N.I.         |
| MRSA                       |     | 21.94 ± 0.39                     | 18.75 ± 2.24 | N.I.         | N.I.         |
| <i>S. pseudintermedius</i> | W01 | 23.31 ± 3.38                     | N.I.         | N.I.         | N.I.         |
|                            | M02 | 29.38 ± 10.4                     | 11.33 ± 5.14 | 17.23 ± 9.65 | 18.90 ± 9.25 |
|                            | M04 | N.I.                             | N.I.         | N.I.         | N.I.         |
|                            | M06 | N.I.                             | N.I.         | N.I.         | N.I.         |
|                            | S02 | N.I.                             | N.I.         | N.I.         | N.I.         |
|                            | S04 | 16.45 ± 1.7                      | 13.75 ± 6.75 | 12.51 ± 6.08 | 7.84 ± 3.79  |
|                            | S06 | 7.72 ± 2.45                      | N.I.         | N.I.         | N.I.         |
|                            | S08 | N.I.                             | N.I.         | 3.43 ± 0.12  | N.I.         |
|                            | S10 | N.I.                             | N.I.         | N.I.         | N.I.         |
|                            | S12 | N.I.                             | N.I.         | N.I.         | N.I.         |
| MRSP                       | M01 | 10.39 ± 5.58                     | N.I.         | N.I.         | N.I.         |
|                            | S01 | N.I.                             | N.I.         | N.I.         | N.I.         |
|                            | S02 | N.I.                             | N.I.         | N.I.         | N.I.         |
|                            | S03 | N.I.                             | N.I.         | N.I.         | N.I.         |
|                            | S04 | 14.42 ± 40.3                     | 5.82 ± 2.01  | N.I.         | N.I.         |
|                            | S05 | 18.89 ± 1.56                     | 17.14 ± 4.9  | 3.05 ± 1.55  | N.I.         |
|                            | S06 | N.I.                             | N.I.         | N.I.         | N.I.         |
|                            | S07 | N.I.                             | N.I.         | N.I.         | N.I.         |
|                            | S08 | N.I.                             | N.I.         | N.I.         | N.I.         |
|                            | S09 | N.I.                             | N.I.         | N.I.         | N.I.         |

Abbreviations: SA, *Staphylococcus aureus* ATCC 25923; MRSA, methicillin-resistant *S. aureus* ATCC 160 33591; MRSP, methicillin-resistant *S. pseudintermedius*; N.I., non-inhibition; W, weak; M, moderate; and S, strong biofilm producers.
