# Supplementary material
Source: MDPI journal article supplement (https://www.mdpi.com/1424-8247/16/5/741)
Supplement: s1 [file s1]

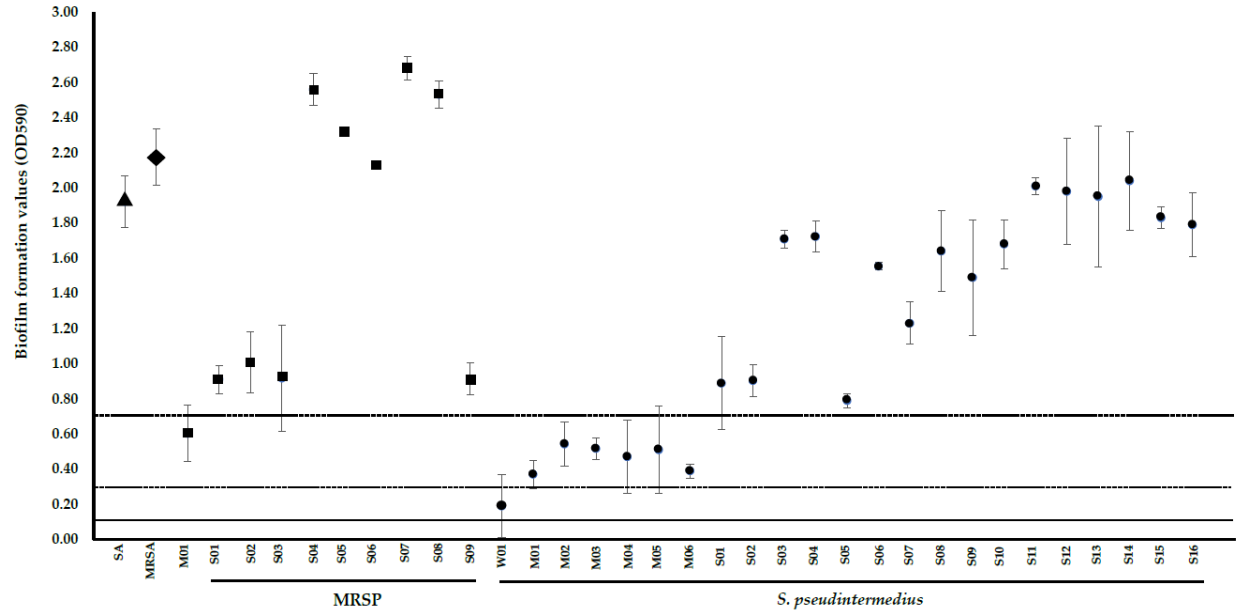

**Figure S6.** Biofilm formation values (OD590) of *Staphylococcus aureus* ATCC 25923 (SA); methicillin-resistant *S. aureus* ATCC 33591 (MRSA), methicillin-resistant *Staphylococcus pseudintermedius* (MRSP, n=10) and *S. pseudintermedius* isolates (n=23) obtained by crystal violet assay. The OD cut-off used to distinguish weak and moderate biofilm producers from strong biofilm producers is 0.18 (dashed line). Categories: non-biofilm producers ( $OD \leq 0.18$ ), weak biofilm producers ( $0.18 < OD \leq 0.35$  (dashed line)), moderate biofilm producers ( $0.35 < OD \leq 0.70$  (dashed line)), and strong biofilm producers ( $0.70 < OD$ ). (▲) SA (◆) MRSA; (■) MRSP; (●) *S. pseudintermedius*).
