# Supplementary material
Source: MDPI journal article supplement (https://www.mdpi.com/1424-8247/16/5/741)
Supplement: s1 [file s1]

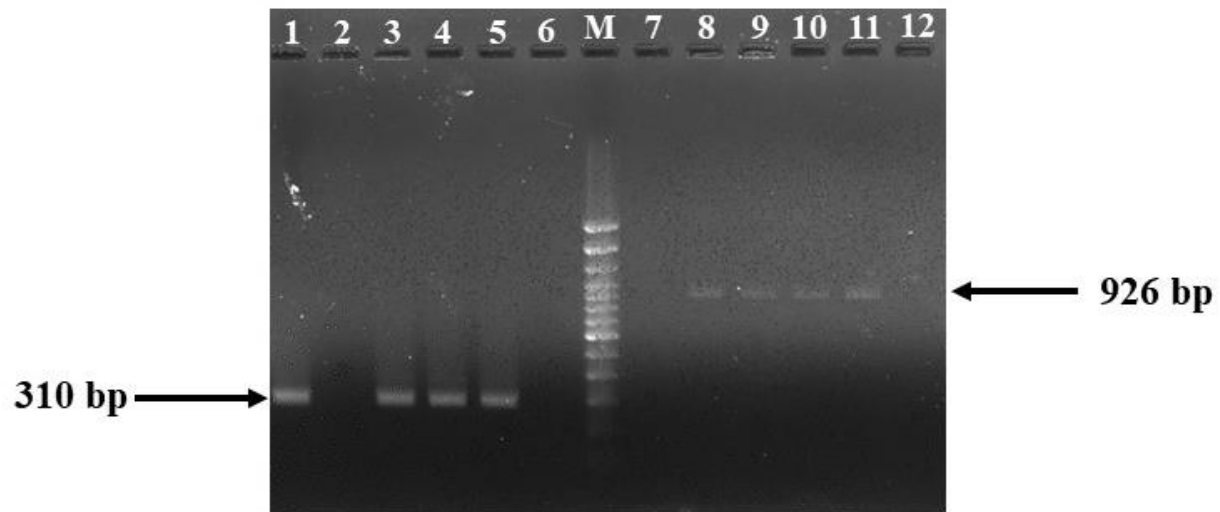

**Figure S1.** PCR amplification of the *mecA* and *nuc* genes of *Staphylococcus pseudintermedius* on 2% Agarose gel electrophoresis. Lane M DNA ladder, MW 100 bp ladder. Lanes 1 and 7 *S. aureus* carrying *mecA* gene showed a typical band size of 310bp corresponding to *mecA* and negative for the *nuc* gene of *S. pseudintermedius*, respectively. Lanes 2-4 and 8-10, *S. pseudintermedius* samples. Lanes 5 and 11, positive control sample, showed a typical band size of 310bp corresponding to *mecA* and 926 bp for *nuc* gene, respectively. Lanes 6 and 12 were the negative control (nuclease-free water).
